# Supplementary material for: The Mediating Role of Sleep in the Association Between Environmental Noise and Mental Health
Source: bioRxiv or medRxiv preprint supplement (doi:10.1101/2024.07.02.24309814), 2024-07-03
Supplement: Supplementary file [file media-1.pdf]

## 1 SUPPLEMENTARY MATERIAL

### 2 The Mediating Role of Sleep in the Association Between Environmental Noise and Mental 3 Health

4 Kaya Grocott<sup>1</sup> MSc, Adelle Mansour<sup>1</sup> MPH, Rebecca Bentley<sup>1</sup> PhD, Kate E. Mason<sup>1</sup> PhD

5 <sup>1</sup> Centre for Health Policy, Melbourne School of Population and Global Health, University of Melbourne

6

#### 7 1. Covariates

8 Covariates controlled for in this analysis were, age in years, sex, baseline mental health measured  
9 by the SF-36 survey, labour force status (employed/unemployed/ not in labour force), household  
10 income (<\$40,000/ \$40,000 - \$59,999/\$60,000-\$99,999/\$100,000-\$149,999/\$150,000), area  
11 socioeconomic disadvantage (quintiles of the Australian Bureau of Statistics' Socio-Economic  
12 Index for Areas (SEIFA) 2011 Index of relative socio-economic advantage/disadvantage), shift  
13 worker (yes/no, where shift work includes regular evening or night shifts, rotating day/night  
14 shifts, split shifts, or being on call), residence in a major city (yes/no), education level (Post-  
15 graduate studies/ Undergraduate studies/Diploma or Cert III-IV/ year 12/< year 12), alcohol  
16 consumption at baseline and follow-up (Never, rarely, weekly- less than daily, daily), and binary  
17 indicators for the birth/adoption of a child, weather related damage to home, death of spouse or  
18 child, major financial improvement or worsening, job loss, personal illness or injury, job changes,  
19 being the victim of a property crime, pregnancy, changes in relationship status including  
20 marriage, separating and reconciling with a partner and retirement.

21

22

23

24 **Appendix Table 1 Variable Availability Across Waves, 2013-2021**

|            | 2012 | 2013 | 2014 | 2015 | 2016 | 2017 | 2018 | 2019 | 2020 | 2021 |
|------------|------|------|------|------|------|------|------|------|------|------|
| Noise      | x    |      | x    |      | x    |      | x    |      | x    |      |
| Sleep      |      | x    |      |      |      | x    |      |      |      | x    |
| SF36 MH    | x    | x    | x    | x    | x    | x    | x    | x    | x    | x    |
| Covariates | x    | x    | x    | x    | x    | x    | x    | x    | x    | x    |

25

26

27 **2. Associations Between Noise, Sleep and Mental Health**28 **Appendix Table 2 Associations Between Self-Reported Noise and Mental Health**

|           | <b>Road Traffic Noise</b>   | <b>P-value</b>    | <b>Plane, Train and Industry Noise</b> | <b>P-value</b> |
|-----------|-----------------------------|-------------------|----------------------------------------|----------------|
| 2012-2013 | <b>-1.17 (-1.72, -0.63)</b> | <b>&lt; 0.001</b> | -0.22 (-0.80, 0.35)                    | 0.448          |
| 2016-2017 | <b>-0.70 (-1.23, -0.16)</b> | <b>0.011</b>      | <b>-0.82 (-1.39, -0.26)</b>            | <b>0.004</b>   |
| 2020-2021 | -0.32 (-0.86, 0.22)         | 0.249             | -0.48 (-1.06, 0.09)                    | 0.101          |

29 Note: Linear regression models adjusted for age, sex, baseline mental health, household income, labour force status,  
 30 education level, alcohol consumption at baseline, area socioeconomic disadvantage, shift work, residence in a major  
 31 city, and several life events. Boldface indicates statistical significance (p<0.05).  
 32  
 33

34 **Appendix Table 3 Relative Odds of Sleep Quality with Noise Exposure**

|           | <b>Road Traffic Noise</b> | <b>P-value</b>    | <b>Plane, Train and Industry Noise</b> | <b>P-value</b> |
|-----------|---------------------------|-------------------|----------------------------------------|----------------|
|           | <b>(OR, 95% CI)</b>       |                   | <b>(OR, 95% CI)</b>                    |                |
| 2012-2013 | <b>1.21 (1.10, 1.35)</b>  | <b>&lt; 0.001</b> | 1.08 (0.96, 1.20)                      | 0.197          |
| 2016-2017 | <b>1.18 (1.07, 1.30)</b>  | <b>0.001</b>      | <b>1.19 (1.07, 1.31)</b>               | <b>0.001</b>   |
| 2020-2021 | 1.05 (0.95, 1.16)         | 0.307             | 1.03 (0.93, 1.14)                      | 0.595          |

35 Note: Logistic regression models adjusted for age, sex, baseline mental health, household income, labour force  
 36 status, education level, alcohol consumption at baseline, area socioeconomic disadvantage, shift work, residence in a  
 37 major city, and several life events. Boldface indicates statistical significance (p<0.05).  
 38

39 **Appendix Table 4 Associations Between Self-Reported Sleep Quality and Mental Health**

|           | <b>Sleep Quality</b>        | <b>P-value</b>    |
|-----------|-----------------------------|-------------------|
| 2012-2013 | <b>-6.11 (-6.67, -5.55)</b> | <b>&lt; 0.001</b> |
| 2016-2017 | <b>-6.27 (-6.79, -5.74)</b> | <b>&lt; 0.001</b> |
| 2020-2021 | <b>-5.80 (-6.34, -5.26)</b> | <b>&lt; 0.001</b> |

40 Note: Linear regression models adjusted for age, sex, baseline mental health, household income, labour force status,  
 41 education level, alcohol consumption at follow up, area socioeconomic disadvantage, shift work, residence in a  
 42 major city, and several life events. Boldface indicates statistical significance (p<0.05).  
 43

### 44 3. Sensitivity Analyses

45 A sensitivity analysis was conducted by changing the definition of exposed for both traffic  
46 and PTI noise, such that only individuals who reported “very common” exposure to noise were  
47 classified as exposed to noise (as opposed to “very common” and “fairly common” in the primary  
48 analysis). For road traffic noise, the total and indirect effect estimates, and proportions mediated,  
49 were similar to those from the primary analysis across all years, but point estimates were less  
50 precise (Appendix Table 5). For PTI noise, evidence for total and mediated effects were seen  
51 only for 2016-17 in the primary analysis. With the narrower definition of exposed, the less  
52 precise estimates contributed to weaker evidence for that period. Consistent with primary  
53 analysis, no associations or mediation were observed for PTI noise in the other years.

54 **Appendix Table 5 Sensitivity Analysis: Exposure redefined as only “very common” exposure to noise**

|                                        | <b>Total Effect</b>         | <b>P-<br/>value</b> | <b>Natural Indirect<br/>Effect</b> | <b>P-<br/>value</b> | <b>Natural Direct<br/>Effect</b> | <b>P-<br/>value</b> | <b>Proportion<br/>Mediated</b> | <b>P-<br/>value</b> |
|----------------------------------------|-----------------------------|---------------------|------------------------------------|---------------------|----------------------------------|---------------------|--------------------------------|---------------------|
| <b>Road Traffic Noise</b>              |                             |                     |                                    |                     |                                  |                     |                                |                     |
| <b>2012-13</b>                         | <b>-1.03 (-1.92, -0.14)</b> | <b>0.023</b>        | <b>-0.23 (-0.43, -0.03)</b>        | <b>0.021</b>        | -0.80 (-1.66, 0.06)              | 0.067               | 0.22 (-0.01, 0.46)             | 0.061               |
| <b>2016-17</b>                         | 0.82 (-1.70, 0.06)          | 0.069               | <b>-0.26 (-0.46, -0.06)</b>        | <b>0.010</b>        | -0.56 (-1.41, 0.30)              | 0.204               | 0.32 (-0.05, 0.70)             | 0.094               |
| <b>2020-21</b>                         | -0.11 (-1.06, 0.84)         | 0.825               | -0.05 (-0.22, 0.12)                | 0.573               | -0.06 (-0.99, 0.87)              | 0.903               | 0.46 (-3.59, 4.51)             | 0.824               |
| <b>Plane, Train and Industry Noise</b> |                             |                     |                                    |                     |                                  |                     |                                |                     |
| <b>2012-13</b>                         | -0.08 (-1.00, 0.84)         | 0.872               | -0.20 (-0.42, 0.01)                | 0.064               | 0.12 (-0.77, 1.02)               | 0.872               | not estimated*                 |                     |
| <b>2016-17</b>                         | <b>-0.95 (-1.86, -0.03)</b> | <b>0.042</b>        | -0.14 (-0.31, 0.03)                | 0.099               | -0.81 (-1.70, -0.09)             | 0.077               | 0.15 (-0.05, 0.35)             | 0.151               |
| <b>2020-21</b>                         | -0.70 (-1.78, 0.35)         | 0.190               | -0.21 (-0.44, 0.01)                | 0.065               | -0.49 (-1.52, 0.53)              | 0.347               | 0.30 (-0.19, 0.79)             | 0.227               |

55 Note: Linear regression models adjusted for age, sex, baseline mental health, household income, labour force status, education level, alcohol consumption at  
56 baseline and follow up, area socioeconomic disadvantage, shift work, residence in a major city, and several life events.

57 Boldface indicates statistical significance (p<0.05).

58 \* An interpretable proportion mediated could not be estimated for the PTI noise model in 2013-13 because signs among indirect, direct, and total effects were  
59 opposing.

## 60 4. Interactions

### 61 Interactions

62 Minimal evidence of interaction between perceived noise exposure and sleep was found  
 63 (Appendix Table 6). Causal mediation analysis makes no assumptions about whether exposure-  
 64 mediator interaction is present; in this instance, observing only limited evidence of interaction  
 65 suggests our decision to use causal mediation analysis over traditional mediation methods may  
 66 have been unimportant, with results from both approaches likely to be similar.

67

### 68 Appendix Table 6 Exposure-mediator interactions in models of noise, sleep and mental 69 health

70

|                  | Noise-Sleep interaction term P-value  |                                    |
|------------------|---------------------------------------|------------------------------------|
|                  | Road Traffic Noise x<br>Sleep Quality | Plane Train and<br>Industry Noises |
| <b>2012-2013</b> | 0.213                                 | 0.180                              |
| <b>2016-2017</b> | 0.177                                 | <b>0.013</b>                       |
| <b>2020-2021</b> | 0.109                                 | 0.464                              |

71 Note: Adjusted for age, sex, baseline mental health, household income, labour force status, education level and  
 72 alcohol consumption at baseline and follow up, area socioeconomic disadvantage, shift work, residence in a major  
 73 city, and several life events.

74

75
